# Supplementary material for: An acidity-triggered aggregation nanoplatform based on degradable mesoporous organosilica nanoparticles for precise drug delivery and phototherapy of focal bacterial infection
Source: Royal Society of Chemistry journal article supplement (doi:10.1039/d4dt02111h), 2024-01-01
Supplement: d4dt02111h1.pdf [file d4dt02111h1.pdf]

## Supporting Information

### **An acidity-triggered aggregation nanoplatform based on degradable mesoporous organosilica nanoparticles for precise drug delivery and phototherapy of focal bacterial infection**

Yunhan Huang, Wei Guo, Xinyu Wang, Jingrui Chang, Bo Lu\*

School of Chemistry, Chemical Engineering and Life Sciences, Wuhan University of  
Technology, Wuhan 430070, PR China.

\*Corresponding author: School of Chemistry, Chemical Engineering and Life Sciences,  
Wuhan University of Technology, Wuhan 430070, PR China.

E-mail: [lvb@whut.edu.cn](mailto:lvb@whut.edu.cn)

Tel & Fax: 086-027-87749300

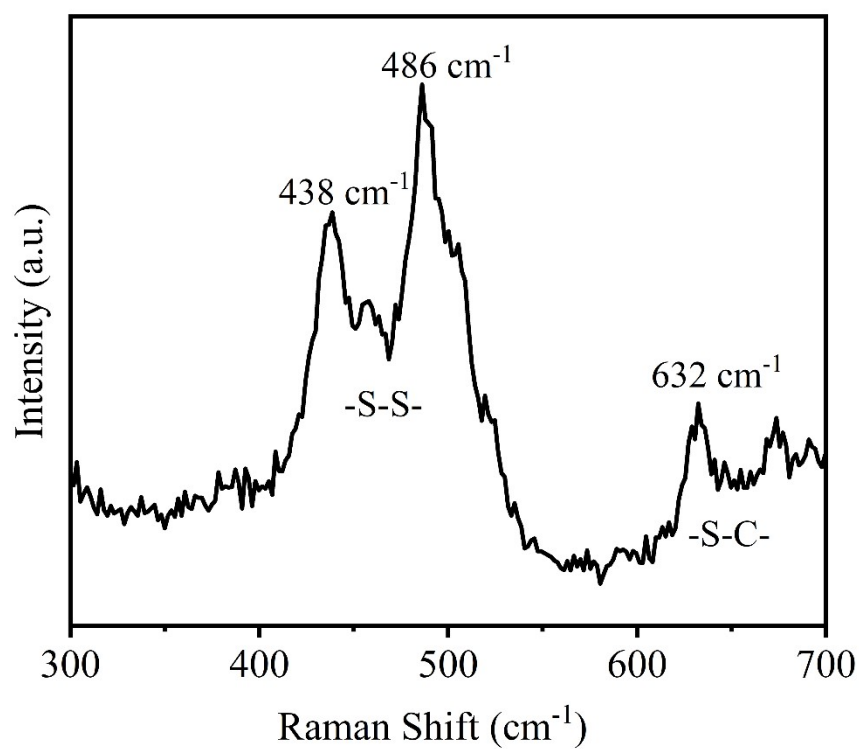

**Fig. S1** Raman Spectrogram of MON NPs.

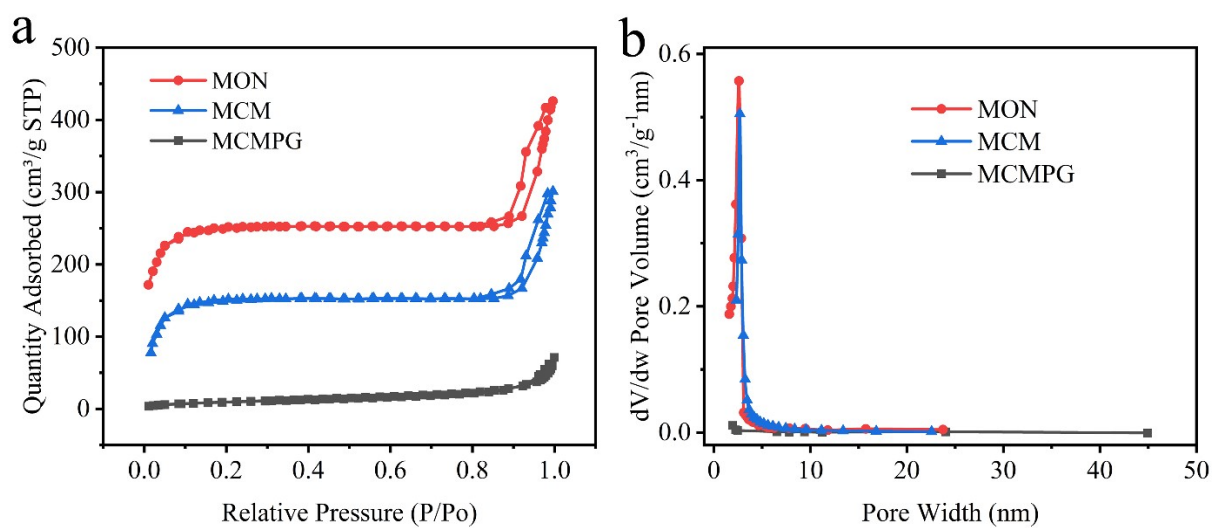

**Fig. S2** (a) BET  $\text{N}_2$  adsorption/ desorption isotherms and (b) BJH pore size distributions of various MON NPs.

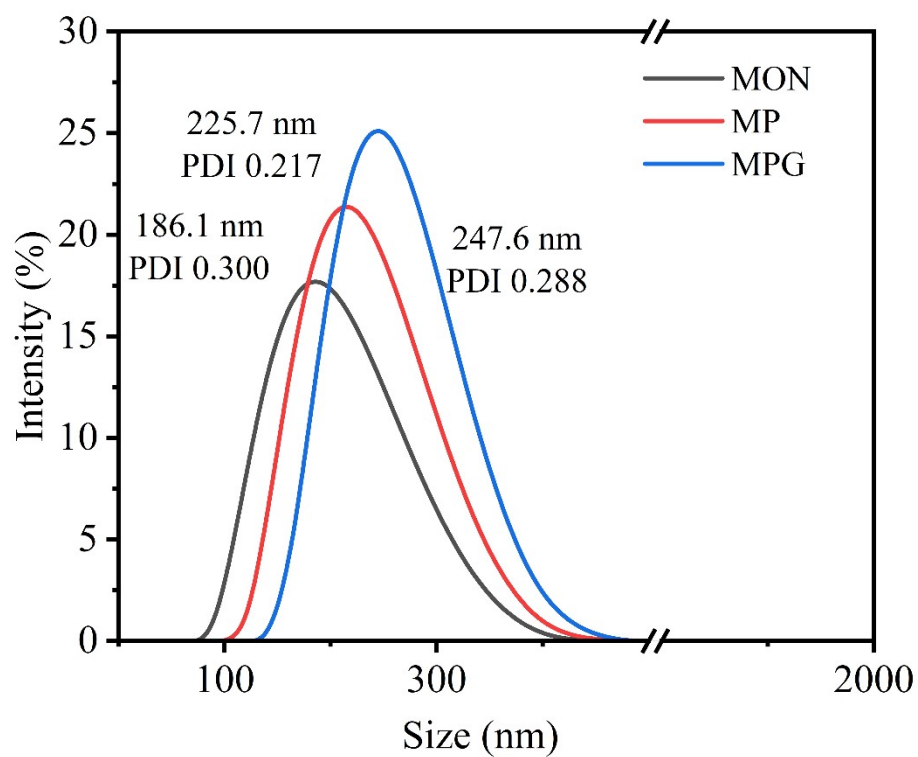

**Fig. S3** Hydrodynamic diameter distributions of MON NPs, MP NPs, and MPG NPs.

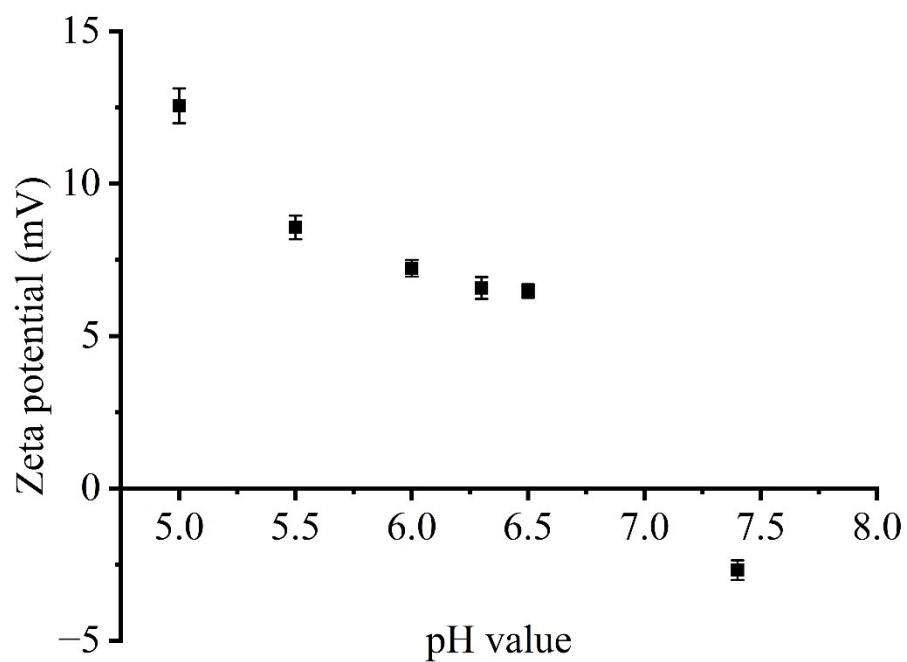

**Fig. S4** The Zeta potential of MPG NPs in PBS at different pH values.

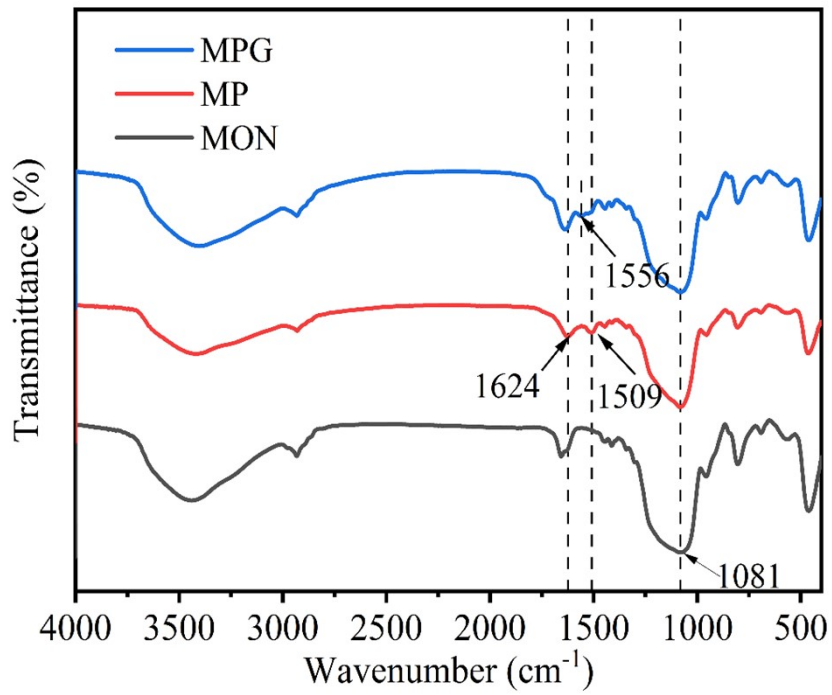

**Fig. S5** Infrared spectra of various stages of MPG NPs synthesis.

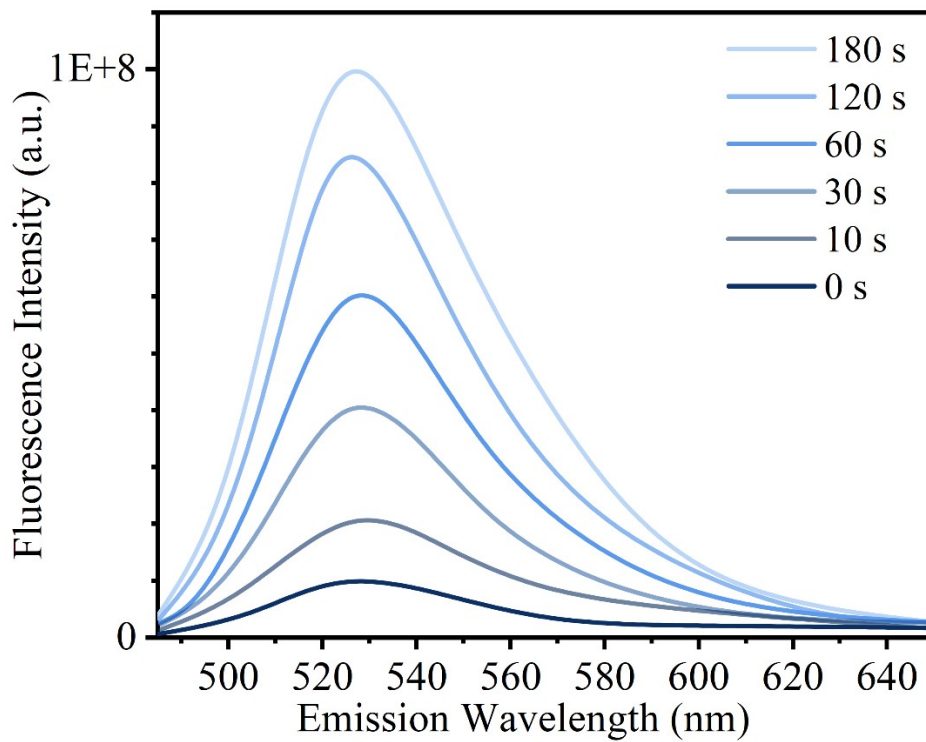

**Fig. S6** Fluorescence spectra of MCMPEG NPs after irradiated 635 nm laser (100  $\text{mW}/\text{cm}^2$ ) by SOSG.

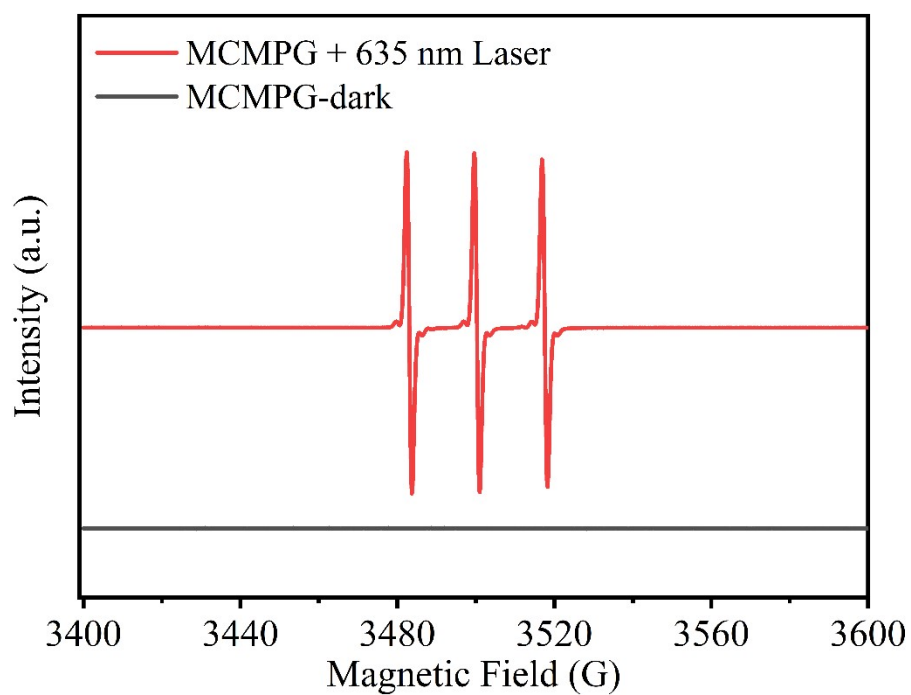

**Fig. S7** The ESR spectra of TEMP-<sup>1</sup>O<sub>2</sub> of MCMPG NPs with or without the laser irradiation.

| MIC       | <i>S. aureus</i> | <i>E. coli</i> |
|-----------|------------------|----------------|
| MCMPG NPs | 40 µg/mL         | 20 µg/mL       |

**Table. S1** MIC values of the as-prepared nanoparticles against *S. aureus* and *E. coli*.
